# Supplementary material for: A nucleolar targeting signal in PML-I addresses PML to nucleolar caps in stressed or senescent cells
Source: Oxford University Press journal article supplement (doi:10.1242/jcs.007492), 2007-09-15
Supplement: jcs007492-figs2.pdf [file jcs007492-figs2.pdf]

# Figure S2A

Human SSRELDSSSESSDLQLEGPSTLRVLDENLADPQAEDRPLVFFDLKIDNETQKISQLAAVNRESKFRVVIQPEAFFSIYSKAVS-LEVGLQHFLSFLSSMRRPILACYKLWGPGLPNFFR  
Mouse SSHELDDSSSESSSLQLEGPNSLKALDESLAEPHLEDRTL VFFDLKIDNETQKISQLAAVNRESKFRVLIQPEAFS-VYSKAVS-LEAGLRHFLSFLTMMHRPILACSRLWGPGLPIFFQ  
Rat ASHELDDSSSESSSLQLEGPNSLKALDESLAEPHLEDRTL VFFDLKIDNETQKISQLAAVNRESKFRVLIQPEAFS-VYSKAVS-LEAGLRHFLSFLNSMHRPILACPRWGPGLPIFFQ  
Chimp -SRELDSSSESSDLQLEGPSTLRVLDENLADPQAEDRPLVFFDLKIDNETQKISQLAAVNRESKFRVVIQPEAFFSIYSKAVS-LEVGLQHFLSFLSSMRRPILACYKLWGPGLPNFFR  
Cat -----QLAAVNRESEFRVLIQPEAFFSIYSKAVS-LEVGLQHFLGFLGSMRRPILACYKLWGPGLPNFFR  
Dog SSRELDSSSESSDLQLEGPSSLRVLDNSLADPQAEDRPLVFFDLKIDSESQKISQLAAVNRESEFRVLIQPEAFFSIYSKAVS-LEVGLQHFLGFLGSMRRPVLACSKLWGPGLPIFFR  
Bull DSRELADNSSESSDLQLEGPSSLVLDSPNSLVEDKPLVFFDLKIDNETQKISQLAAVNQESQFRALIQPEVLN-VYSKAVS-LEVGLQHFLHFLASMRQPILACYKLWGPGLPSFFQ  
Boar SSQEQDSSSEASDLQLEGPSSLVLDLINSGAEDRPLVFFDLKIDSESQKISQLAAVNQESQFRMLIQPEAFT-IRSKAVS-LEVGLQHFLHFLGNMRQPILACYKLWGPGLPSLFR  
Elephant -----QKISQLAAVNRESKFRVLIQPEAFFSIYSKAVS-LEVGLRHFLRFLGSMHRPILACYKLWGPGLPKFFQ  
Chicken -DPSLLDDMLEDGTSRDNSHLPICLKN---TLDVQGQSVIFFDVEIWKN--EVIQMSVVDKEKMLSVIIQPMCLPTSPAITSYEMGLRDL LSHLSTIRPILAAFDLWSLPFPPTLLK  
\*::\*::\* . : \*\*\* . . \* \*\*::\* . \* ::::\*::\*\* . \*\* . : \* :::

Human ALEDINRLWEFQEAISGFLAALPLIRERVPGASSFKLKNLAQTYLARNMSE-RSAMAAMLAMRDLRLLLEVPSPGQLAQHVPFSSLQCFASLQPLVQAAVLPRAEARLLALHNVSFMEL  
Mouse TLSDINKLWEFQDTISGFLAVLPLIRERIPGASSFKLGNLAKTYLARNMSE-RSALASVLAMRDLRLLLEVPSPGLPLAQHIYSFSSLQCFASLQPLIQAVLPQSEARLLALHNVSFVEL  
Rat ALNDINKLWEFQDAISGFLAVLPLIQERIPASSFKLRNLAKTYLARNMSE-RSALAAMLAMRDLRLLLEVPSPGLPLAQHIYSFSSLQCFASLQPLIQAVLPQPEARLLALHNVSFLEL  
Chimp ALEDINRLWEFQEAISGFLAALPLIRERVPGASSFKLKNLAQTYLARNMSE-RSAMAAMLAMRDLRLLLEVPSPGQLAQHVPFSSLQCFASLQPLVQAAVLPRAEARLLALHNVSFMEL  
Cat ALEDMNRLWEFQEVISGFLAALPLIRERVPRASSFKLKLAKTYLARNMSE-RSALAAMLAMRDLRLLLEVPSPGQLAQHVPFSSLQCFASLQPLVQAAALPRAEARLLALHNVSFTEL  
Dog ALEDMNRLWGFQEAISGFLAVLPLVRERVPQASSFRLRSLAKTYLARNVNE-RSALATVLAALRDLRLLLEVPSPGQLAQHVPFSSLQCFASLQPLVQAAALPRAEARLLALHNVSFTEL  
Bull ALEMNMLGKFQKISGFLATLPLIRECVPGASSFKLKLAKTYLARNMSE-RSALAAMVTMRDLRLLLEVPSPGQLAQHVPFSSLQCFSSLQPLVRAAILPRAEARLLALHKVTFIEL  
Boar ALEDMNRLQEFRKAISGFLAILPLIRECVPGASSFKLKNLAETYLARNMNETRSALASVVTMRDLRLLLEVPSPGQLAQHVPFSSLQCFSSLQPLVRAAVLPRAEARLLALHKVTFIEL  
Elephant ALEDMNSLWEFQESISGLLATLPLIREQIPGASSFKLKNLAKTYLARNVNE-RSALASVLAMRDLRLLLEVPF---EARHIYSFNSLQCFASLQPLVRAAVLPRAEARLLALHNVSFEEL  
Chicken SLMAIGKKEEFFSMVYGFGLDVLPLIKEKIPMKESCKLKNLASNLLWRDLSS-SSTLESARATKDL CNVLEIDLK-SKPRQLLSLANLESFMSLQPLLDKRLLSRPSAQT LASHGIGLPEL  
:\* .: \* .: \*::\* \*\*\*::\* :\* . \* : \* . \* . \* \*::: \*:: .: .: : \*\*\* :\*\*: : : .: \*::\* \*\*\*\*\*: \* .: \*::\* \* : : \*\*

Human LSAHRRDRQGGLKKYSRYLSLQTTT---LPPAQPAFNLAQALGTYFEG-LLEGPALARAEGVSTPLAGRGLAERASQOS  
Mouse LNAYRTNRQEGGLKKYVHYLSLQTTPLSSASTQVAQFLOALSTHMEG-LLEGHAPAGAEG-----KAESKGCLA--  
Rat LTAYRSNRQEGGLKKYVHYLSLQTTT---SSASTQIAQFLOALSAYMDG-QLEGHIPAGAEGTALSLSGRAENKGCCLA--  
Chimp LSAHRRDRQGGLKKYSRYLSLQTTT---LPPAQPAFNLAQALGTYFEG-LLEGPALARAEGVSTPLAGHGLAERASQOS  
Cat LTAHRRDPERGLKKYSRYLSLQTTT---SPPMQRAVNLQALSSYFKG-LSEEA AVARAEG---IAGHSLAEKAPQOS  
Dog LAAHRRDPQGLKKYSRYLGPQTS---SPPSQRVSLQALSTYFKG-RSEGAVSAPAQGLSTLLTGHSFAKRACQOS  
Bull LTAHHHDPQGLKKYRFLSLQSP---S---SQPVFDLHSLGTYFEG-LLGAPASAGAGGVAAPPAGHSLAERATQOT  
Boar VTAHHHDPQEGGLKKYCNFLSPQSPS---SPPTQSAFNLAQALGTYFDKGLREGLASTKAEGSSLLTDHSLVERASQES  
Elephant LAAHRCDPQGAFFKYSQYLSPOAAP---APPTQPAFDLQVLSAYFAG-LL-----  
Chicken HACFACDP IRGLPKMCAVNAHRHP-----SEKVRHLSKVKAYFQQOPLAGSSHALVHDELLEAMKTKQDC-----  
. . : .: \* .: .: .: .: \* ::::

Figure S2B

Exon 8a

|             |     |             |          |                |                 |        |                |                   |        |
|-------------|-----|-------------|----------|----------------|-----------------|--------|----------------|-------------------|--------|
| Human PML-1 | 610 | LVFFDLK     | IDNE [1] | QKISQLAAVN [1] | ESKFRVVIQP      | EA [1] | FSIYSKAVS      | LEVGLQHFLSFLS [2] | RR [1] |
| A           | 7   | QIVLDTE [3] | MNQI [6] | HKIIEIGAVE [7] | GNNFHVYLKP      | DR [1] | VDPEAFGVH [12] | FAEVADEFMDYIR     | GA [1] |
| B           | 220 | MFSVDCE [3] | TDVA [1] | RELTRISIVD [3] | NTILDTLVKP      | EG [1] | ITDYVTRWS [13] | LGDVQKAIQSLLP     | PD [1] |
| C           | 110 | VIVSDLE [3] | LHRK [1] | ERIIEIAAQD [5] | YSTFQTLVNP      |        | VPITNAHIH [14] | MEELIPIFLRYVE     | SR [8] |
| D           | 242 | VLSLDCE [3] | TSLG     | YEMIRLTIVD [4] | KTLEFDHVIQP     | IG [1] | IVDLNSDFS [13] | KEALDVFLSENLI     | NK [2] |
| E           | 10  | MVWVDLE [3] | LDIE [1] | DQIIEMACLI [8] | AEGPNLI IKQ [4] | LD [1] | MSDWCKEHH [15] | LQQAIEYEFLSFVR    | QQ [6] |
| F           | 357 | FVVLDLE [3] | LDPQ [1] | DEIIEIGAVK [6] | VDEYHTLIKP      | SR [1] | ISRKSSEIT [12] | IEEVLPEFLGFLE     | DS [1] |
| G           | 5   | FVVIDVE [4] | SPKK [1] | DKIIQIAAVV [6] | TERFSKYINP      | NK [1] | IPAFIEQLT [12] | FEAVAEVVFQLLD     | GA [1] |
| H           | 18  | FVVIDLE [3] | FDVE [1] | SEVIDLAAVR [6] | TEKFSTLVYP      | GY [1] | IPERIKKLT [12] | IEEVLPEFLEFVG     | DN [1] |
| I           | 421 | VVFDVE [3]  | LSNQ [1] | DKIIELAAVK [6] | IDKFERFSNP      | HE [1] | LSETIINLT [12] | IEEVLTEFKEWVG     | DA [1] |

|            |  |                    |          |               |                    |            |                    |  |     |
|------------|--|--------------------|----------|---------------|--------------------|------------|--------------------|--|-----|
| Human PML1 |  | ILAGPLPNFFRALE     | DIN [15] | LPLIRERV [ 6] | KLKNLAQTYLARN [3]  | .RSAMA     | AVLAMRDLCRLLLE [4] |  | 759 |
| A          |  | LVIHNAAFDIGFMD [1] | EFN [18] | LAVARKMF [ 5] | SLDALCARYEIDN [5]  | .HGALL [1] | AQILAEVYLAMTG [4]  |  | 184 |
| B          |  | ILVGHLEHDLQAMK [1] | THP [ 5] | GHVLNYTN [ 7] | SLKNLTEFLGAQ [6]   | .HCSYE [1] | AWAAMRLAQLKLE [4]  |  | 380 |
| C          |  | LVAHNKSFDQFLI [1]  | EFN [15] | LPLARENM [11] | SLEALADYYSLTR [4]  | .HRALS [1] | VLLLSKVFQKLT I [4] |  | 291 |
| D          |  | ILIGHLENDLNVMR [1] | FHN [ 5] | AILYSRTK [ 3] | SLKNLAFEVLSRK [5]  | .HDSSQ [1] | AIATMDVVVKVIG [4]  |  | 398 |
| E          |  | PLAGNVHEDKKFLD [1] | YMP [ 5] | LHYRIIDV [ 1] | TVKELCRRWYPEE [10] | HRALD [1]  | ISESIKELQFYRN [4]  |  | 184 |
| F          |  | IVAHNANFDYRFLR [1] | WIK [14] | LALAKSL [ 5]  | SLDSVVEKLGLGP [3]  | HRALD [1]  | ARVTAQVFLRFVE [4]  |  | 522 |
| G          |  | FVAHNIHFDLGFVK [1] | ELH [14] | VELSRIVF [ 6] | KLTELSEELQLRH [3]  | HRADS [1]  | AEVTGLIFLEILE [4]  |  | 172 |
| H          |  | VVGHFVEQDIKFIN [1] | YTK [14] | LKLARKVF [ 6] | SLKEIAENFGFET [3]  | HRALK [1]  | ATLTAEIFIKILE [4]  |  | 184 |
| I          |  | FVAHNASFDMGFID [1] | GYE [14] | LELSRTIN [ 6] | GLNFLAKKYGVEL [3]  | HRAIY [1]  | TEATAYIFIKMVQ [4]  |  | 587 |
