# Supplementary figures and images for: A nucleolar targeting signal in PML-I addresses PML to nucleolar caps in stressed or senescent cells
Source: Oxford University Press journal article supplement (doi:10.1242/jcs.007492), 2007-09-15

**Fig S1A**

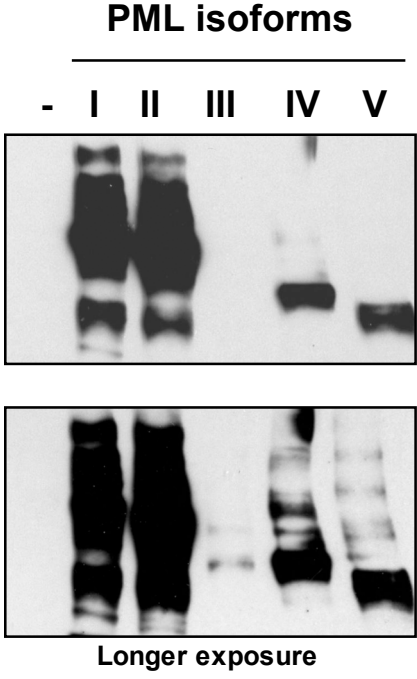

Fig S1B

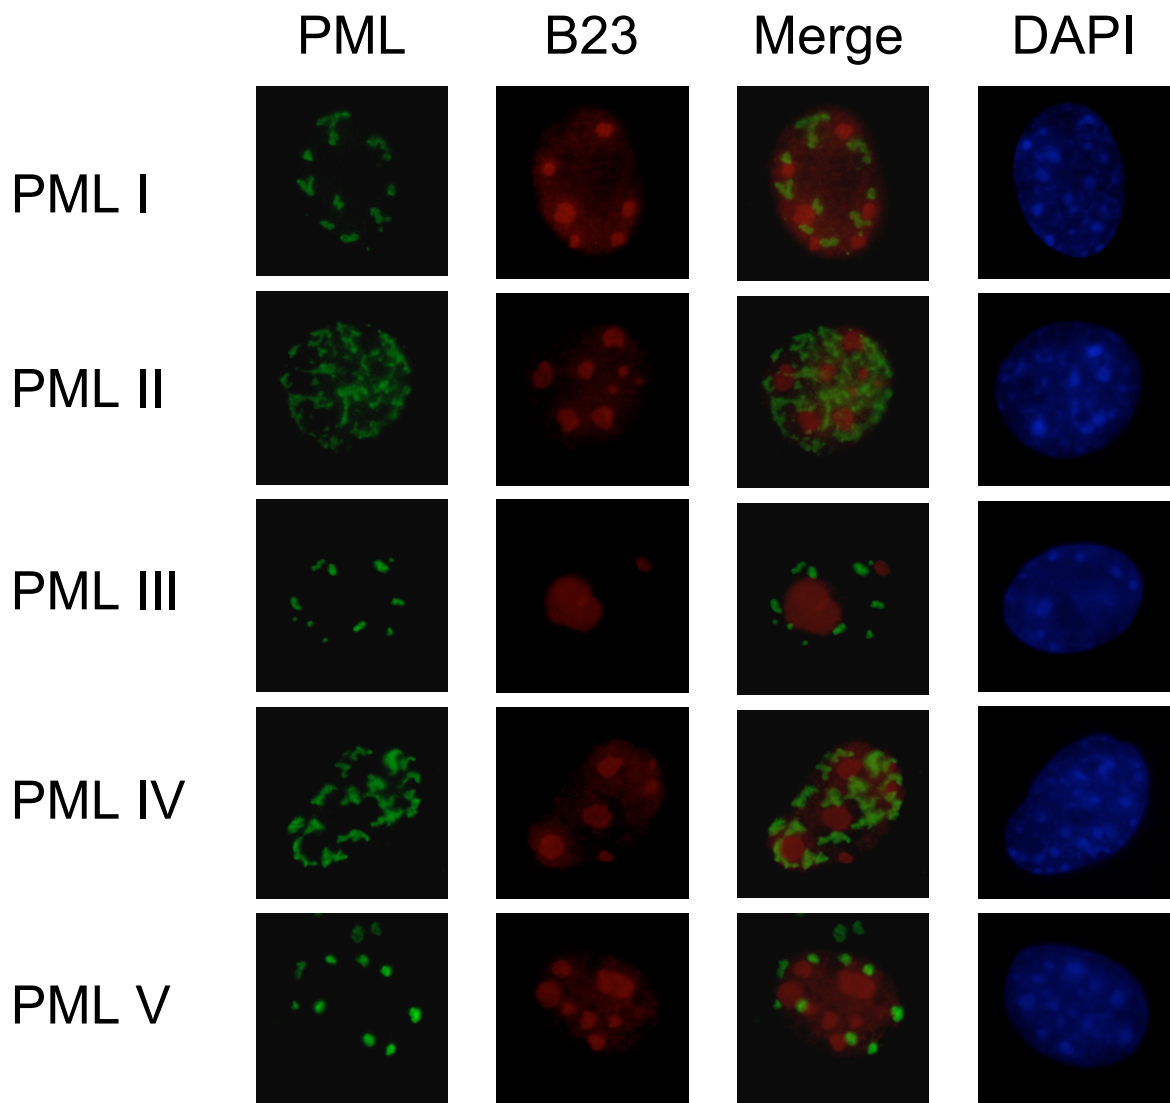

Fig S1C

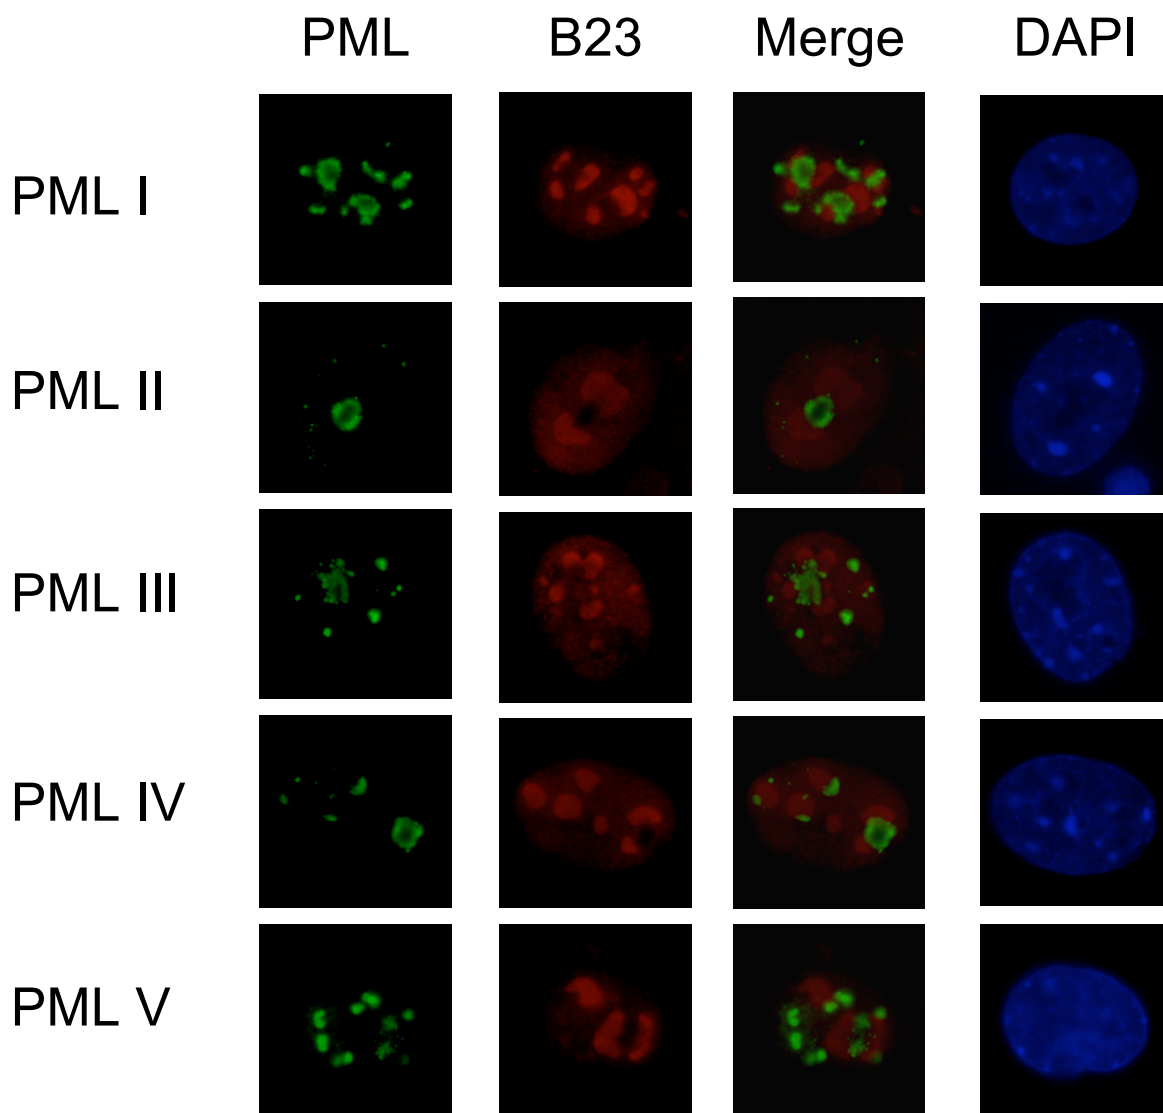

Fig S1D

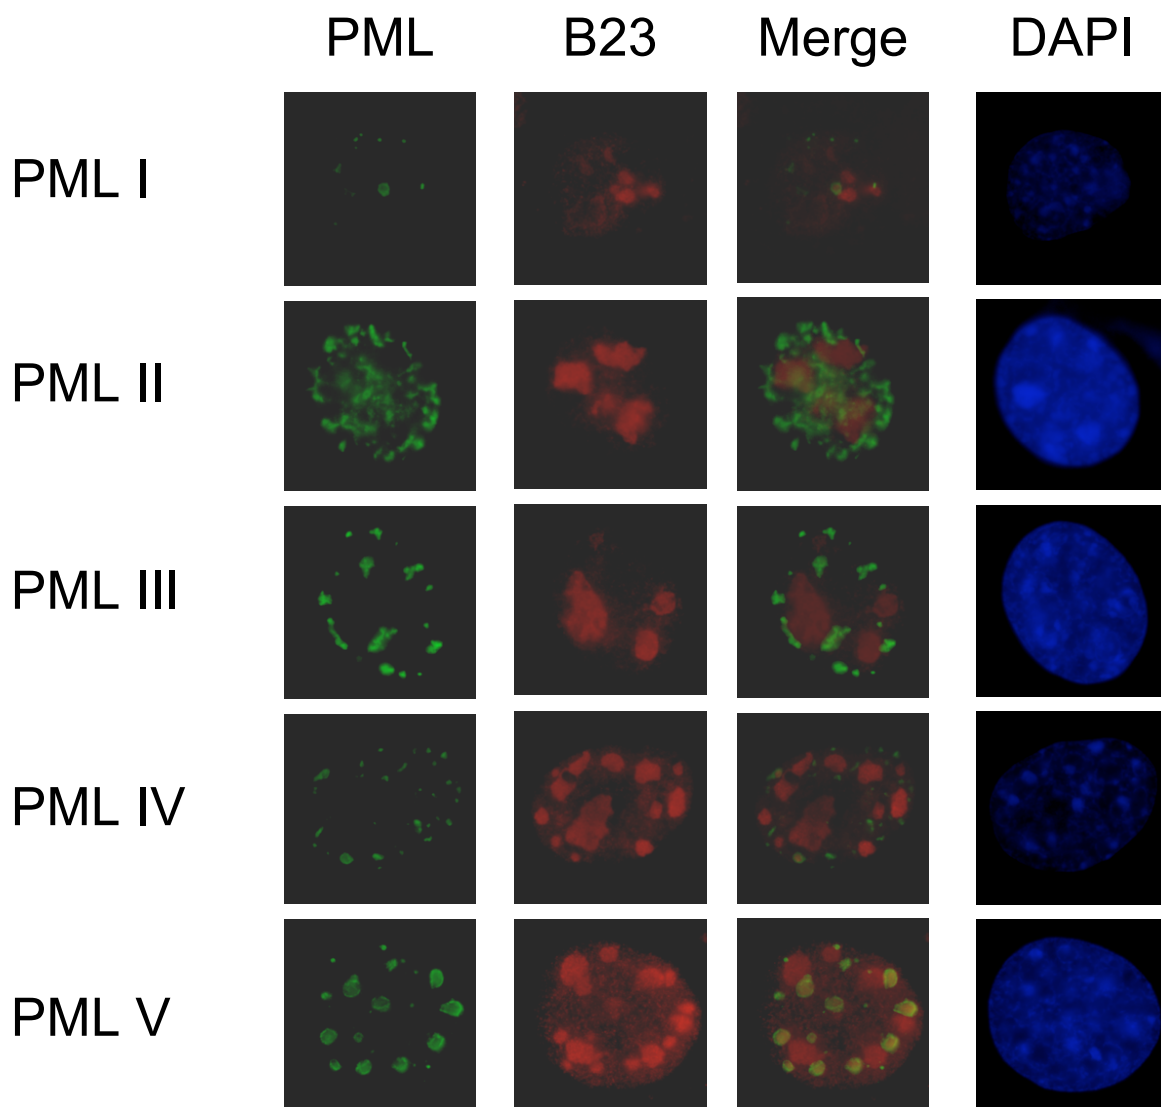

Fig S1E

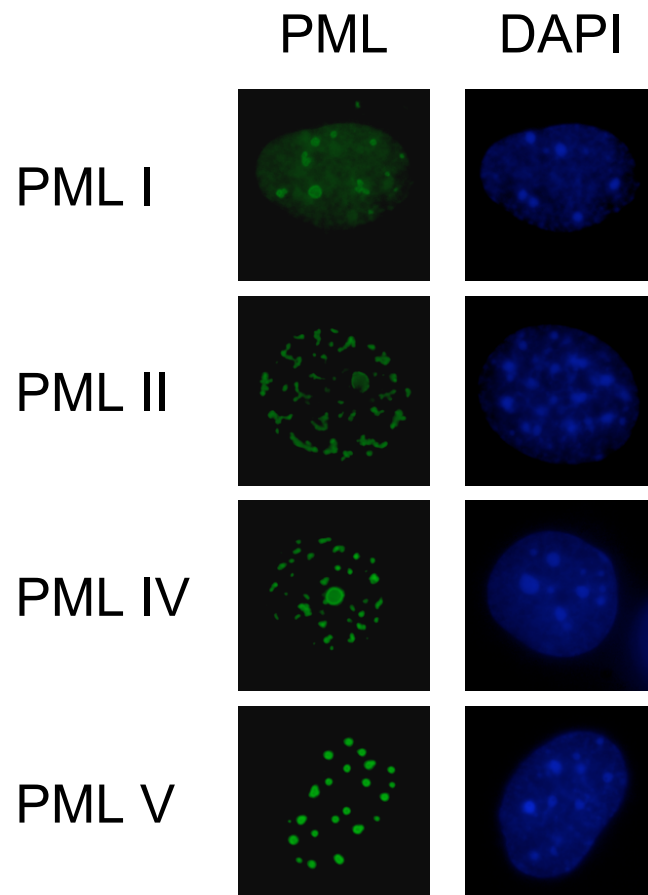

Fig S1F

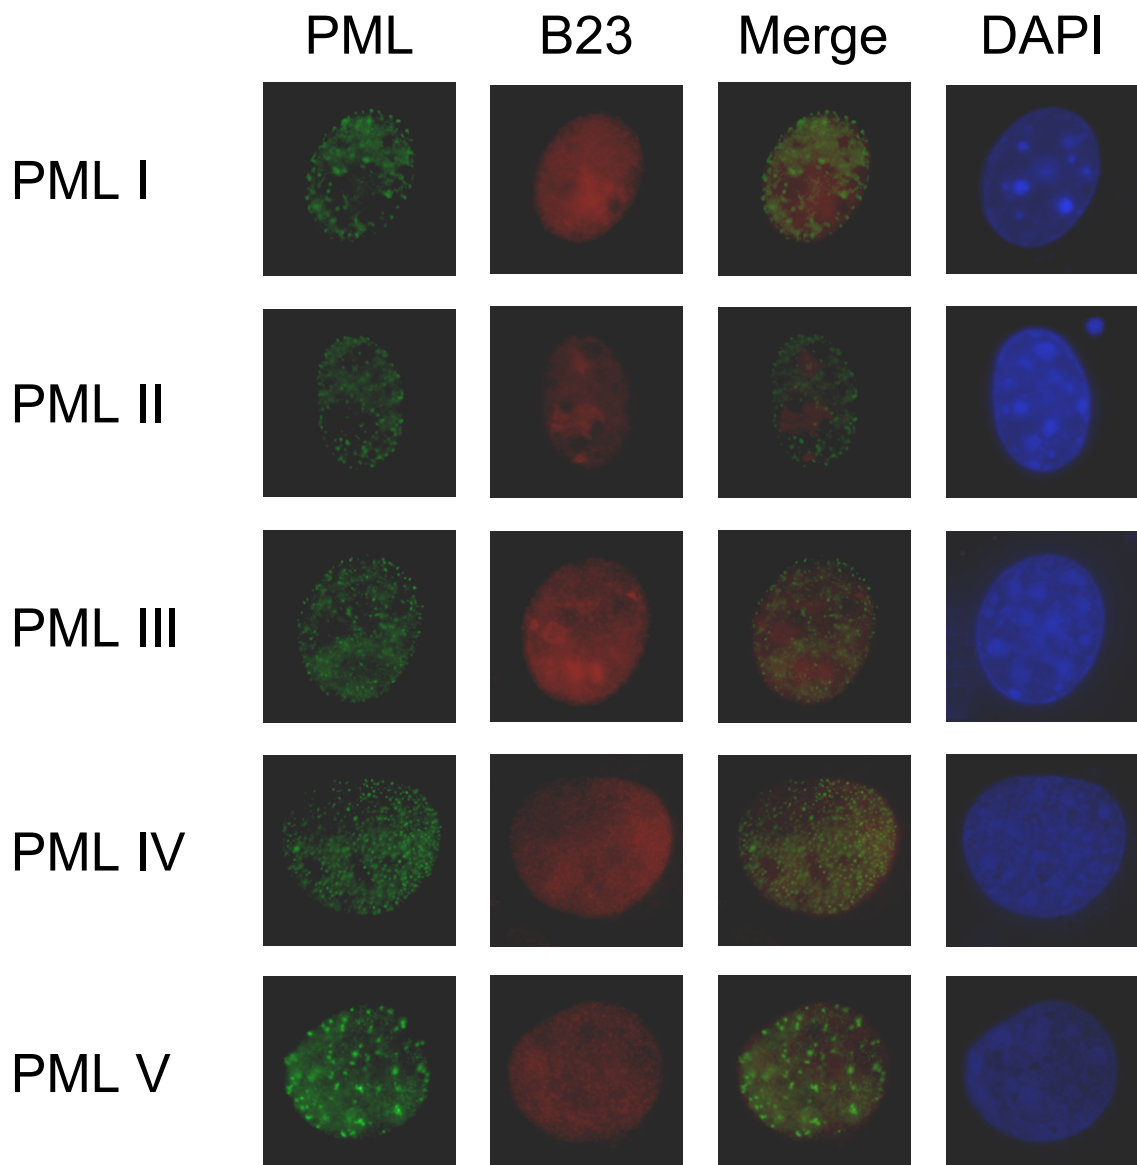

Fig S1G

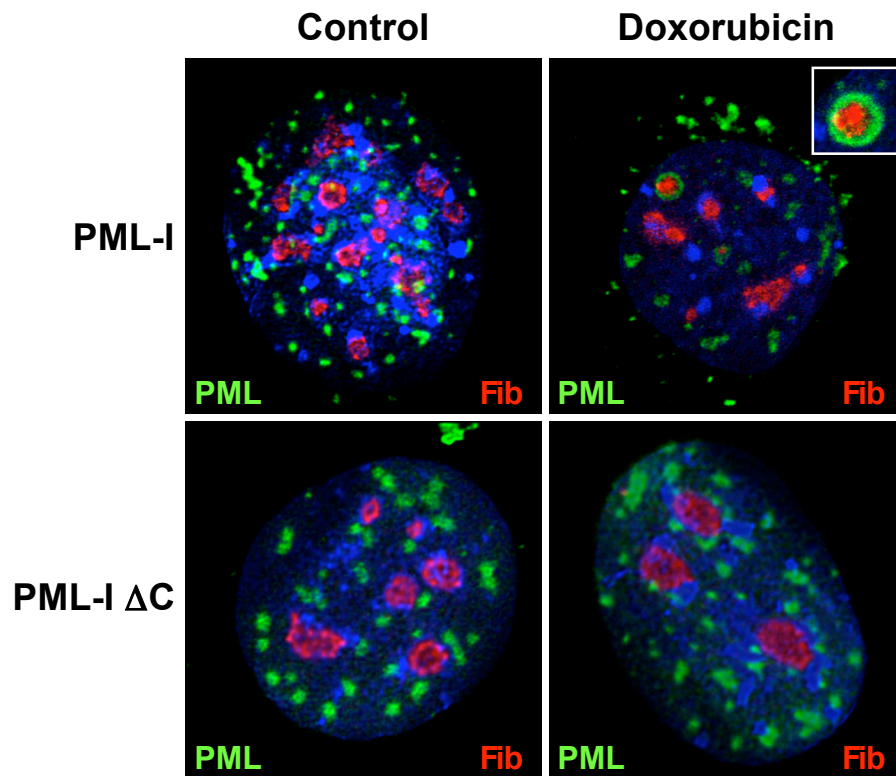

Supplement: jcs007492-figs1.pdf [file jcs007492-figs1.pdf]

Figure S3

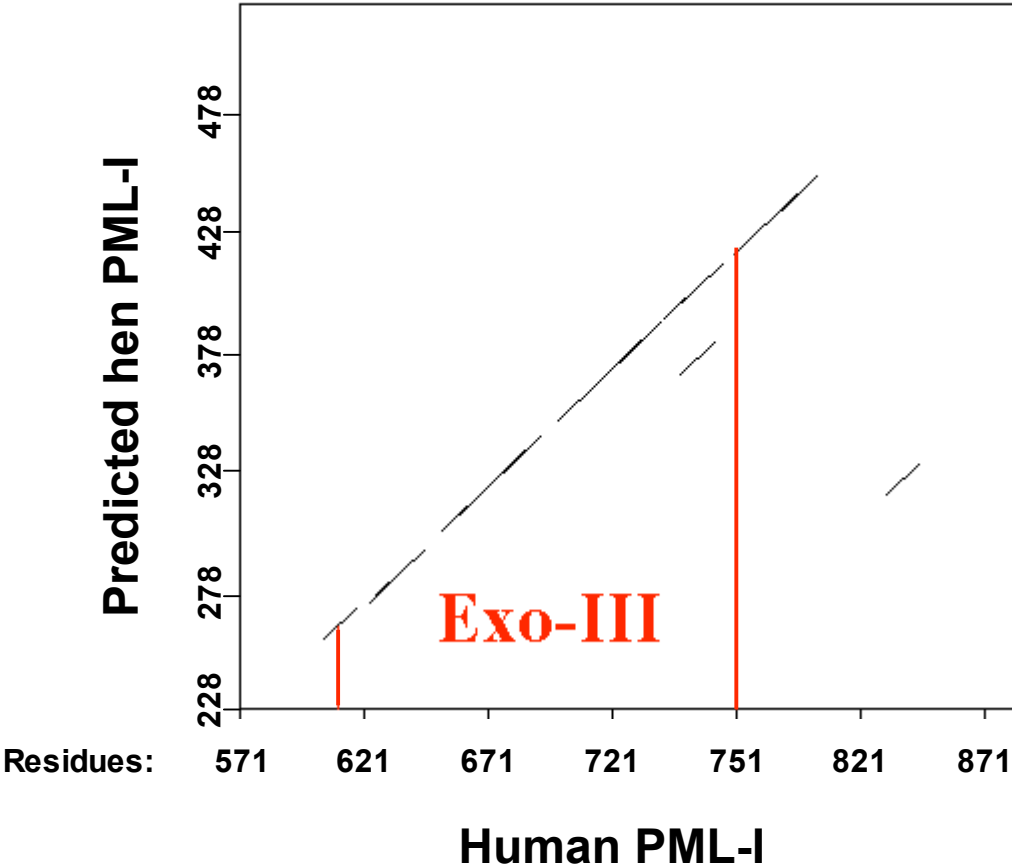

Supplement: jcs007492-figs3.pdf [file jcs007492-figs3.pdf]

Figure S4

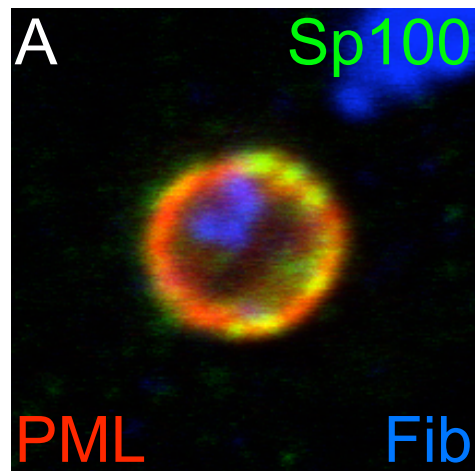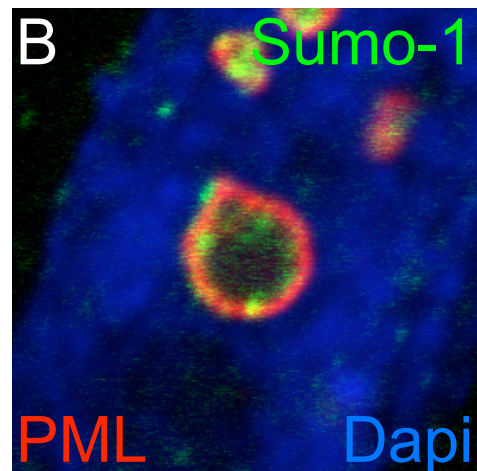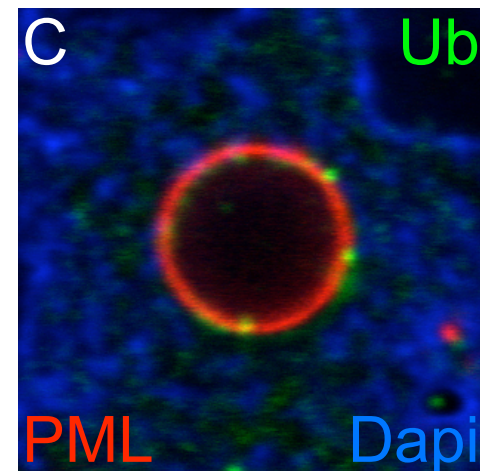

Supplement: jcs007492-figs4.pdf [file jcs007492-figs4.pdf]
